# Supplementary material for: Expanding the Role of Robotic Surgery: Non-Inferiority of Robot-assisted radical cystectomy in Overweight Patients with Bladder Cancer
Source: Research Square preprint supplement (doi:10.21203/rs.3.rs-7856509/v1), 2025-10-29
Supplement: Supplementary file [file 9123dbecc134e173edd90782.pdf]

Online Resources:

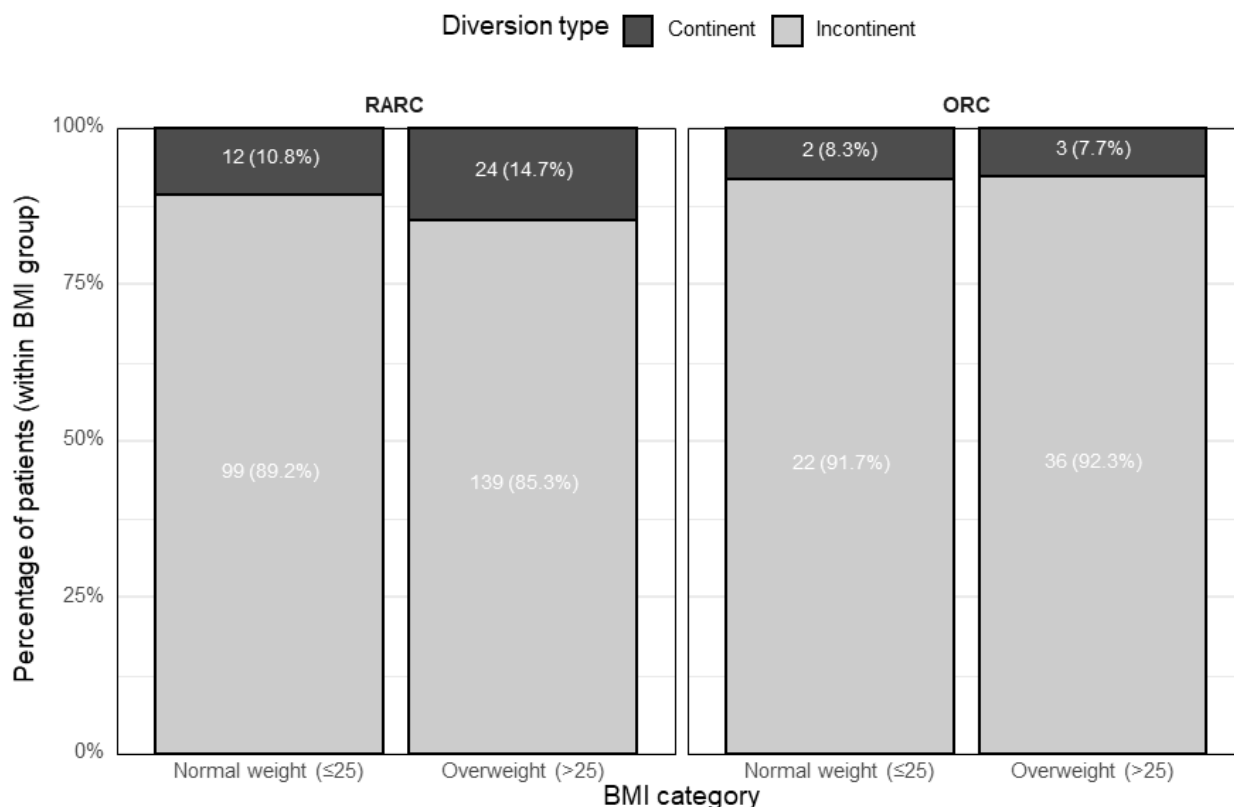

**Fig. 1** Type of urinary diversion by BMI category and surgical method. Distribution of continent and incontinent urinary diversion types stratified by body mass index (BMI) category and surgical approach. Population: n = 334. Groups: normal weight ( $\leq 25$  kg/m<sup>2</sup>) and overweight ( $> 25$  kg/m<sup>2</sup>); surgical method: robot-assisted radical cystectomy (RARC) and open radical cystectomy (ORC). Bars represent proportions of continent (dark grey) and incontinent (light grey) diversions within each subgroup, shown as absolute counts and percentages. After RARC, continent diversions were performed in 12/111 (10.8%) normal-weight and 24/163 (14.7%) overweight patients; after ORC, continent diversions were performed in 2/24 (8.3%) and 3/39 (7.7%), respectively.

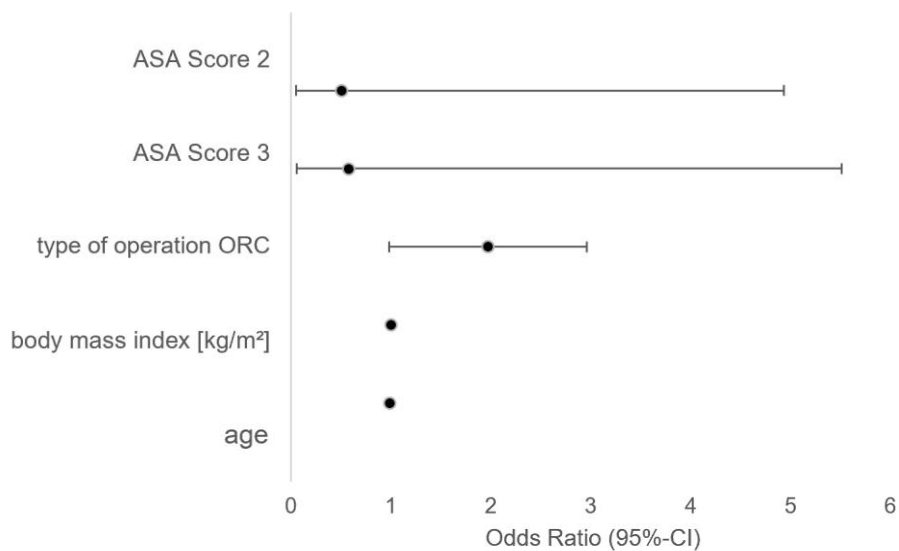

**Fig. 2** Risk factors for prolonged hospital stay (>14 days) after radical cystectomy. Forest plot from a multivariable logistic regression showing adjusted odds ratios (OR) with 95% confidence intervals (CI) for ASA class, type of operation (ORC vs RARC), body mass index (BMI), and age in the study cohort. Points denote adjusted ORs and horizontal bars the 95% CI; the reference line is OR = 1. Reference categories and scaling: ASA 1 (reference, not plotted); operation type reference = RARC; BMI per 1 kg/m<sup>2</sup>; age per 1 year. Abbreviations: ASA, American Society of Anesthesiologists; ORC, open radical cystectomy; RARC, robot-assisted radical cystectomy; CI, confidence interval; BMI, body-mass index

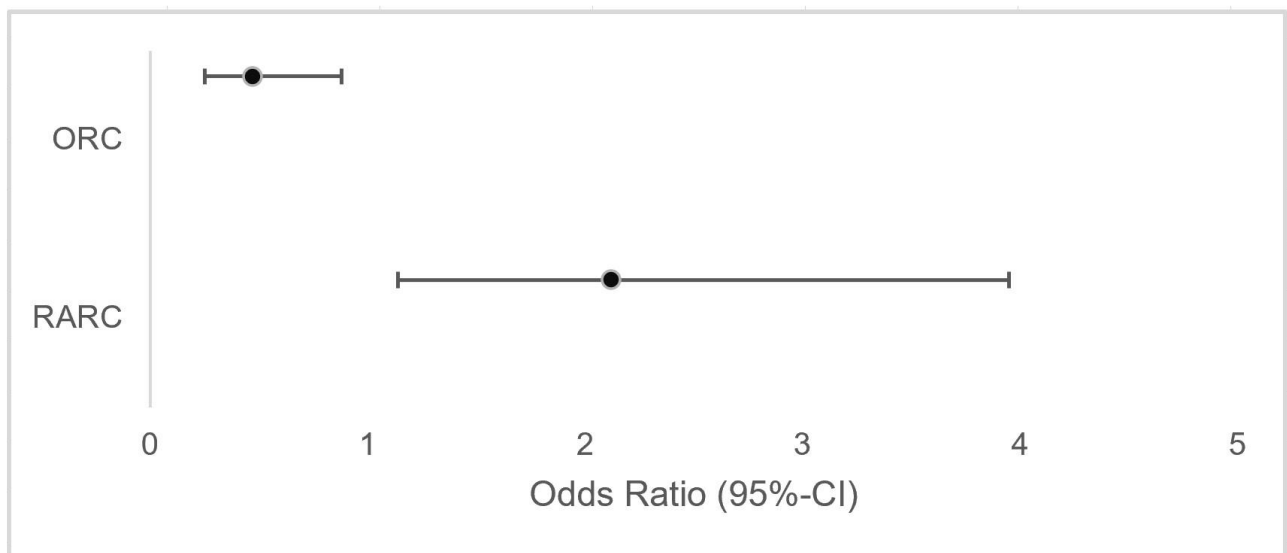

**Fig. 3** Odds of a complication-free postoperative course by surgical approach. Points show odds ratios (OR) and horizontal bars 95% confidence intervals (CI) from logistic regression in the study cohort (n = 307); estimates: ORC 0.47 (95% CI 0.25–0.88) and RARC 2.12 (95% CI 1.14–3.98). Abbreviations: ORC, open radical cystectomy; RARC, robot-assisted radical cystectomy; CI, confidence interval

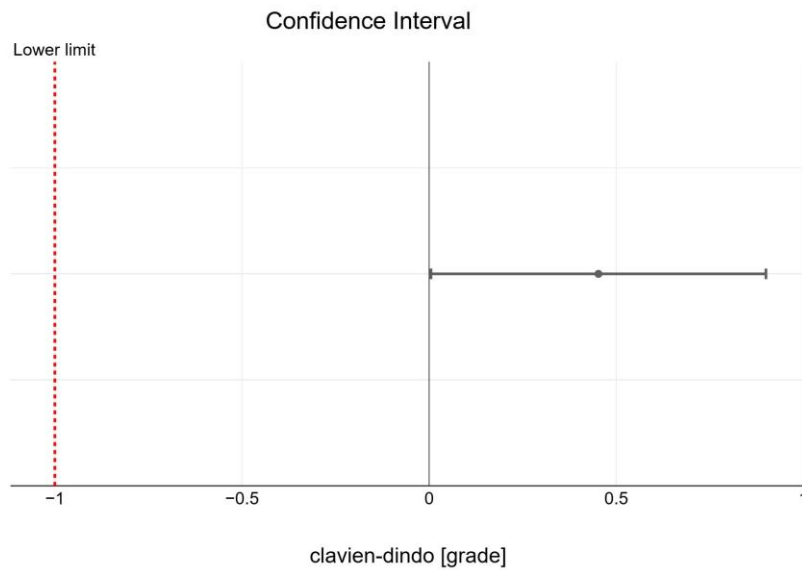

**Fig. 4** Non-inferiority of postoperative morbidity in overweight patients (BMI > 25 kg/m<sup>2</sup>) comparing RARC with ORC. Point estimate and 95% confidence interval (CI) for the difference in Clavien–Dindo grade (RARC – ORC); the vertical dashed line at –1 denotes the prespecified non-inferiority margin (maximum tolerable difference of 1 grade). The 95% CI lies entirely to the right of this margin, indicating that RARC is not worse than ORC within a one-grade tolerance on the Clavien–Dindo scale. Abbreviations: RARC, robot-assisted radical cystectomy; ORC, open radical cystectomy; CI, confidence interval; BMI, body-mass index

**Tab. 1** Logistic regression for the odds of receiving a continent urinary diversion by surgical approach and BMI, including the method × BMI interaction. Entries are odds ratios (OR) with 95% confidence intervals (CI) and p-values; OR > 1 indicates higher odds of continent diversion. Reference categories: surgical method ORC (vs RARC) and BMI ≤ 25 kg/m<sup>2</sup> (vs > 25 kg/m<sup>2</sup>). Abbreviations: OR, odds ratio; CI, confidence interval; BMI, body-mass index; ORC, open radical cystectomy; RARC, robot-assisted radical cystectomy

| Logistic regression: continent diversion ~ method * BMI |           |            |             |             |
|---------------------------------------------------------|-----------|------------|-------------|-------------|
| Term                                                    | OR        | 95% CI low | 95% CI high | p           |
| (Intercept)                                             | 0.1111111 | 0.01765998 | 0.3848172   | 0.003199549 |
| methodRARC                                              | 1.1379310 | 0.27418323 | 7.7588913   | 0.873436339 |
| bmioverweight                                           | 0.6923077 | 0.10570636 | 5.6006767   | 0.700589791 |

|                               |           |            |            |             |
|-------------------------------|-----------|------------|------------|-------------|
| methodRARC:bmio-<br>verweight | 2.3410333 | 0.25803437 | 17.7408910 | 0.409839310 |
|-------------------------------|-----------|------------|------------|-------------|

**Tab. 2:** Complication spectrum after radical cystectomy by surgical approach and BMI category. Counts (n) and percent within method are shown for each complication type (none, infectious, cardiopulmonary, gastroenterological, etc.); percentages are calculated within the corresponding surgical method subgroup and may not sum to 100 due to rounding. Abbreviations: ORC, open radical cystectomy; RARC, robot-assisted radical cystectomy; BMI, body-mass index (normal-weight  $\leq 25$  kg/m<sup>2</sup>; overweight  $>25$  kg/m<sup>2</sup>)

| Complication spectrum by method, BMI and type |            |                     |    |                 |
|-----------------------------------------------|------------|---------------------|----|-----------------|
| Method                                        | BMI        | Complication type   | n  | % within method |
| ORC                                           | overweight | none                | 11 | 17.7            |
| ORC                                           | normal     | none                | 5  | 8.1             |
| RARC                                          | overweight | none                | 62 | 25.5            |
| RARC                                          | normal     | none                | 41 | 16.9            |
| ORC                                           | overweight | infectious          | 3  | 4.8             |
| ORC                                           | normal     | infectious          | 3  | 4.8             |
| RARC                                          | overweight | infectious          | 14 | 5.8             |
| RARC                                          | normal     | infectious          | 8  | 3.3             |
| ORC                                           | overweight | cardiopulmonary     | 3  | 4.8             |
| ORC                                           | normal     | cardiopulmonary     | 9  | 14.5            |
| RARC                                          | overweight | cardiopulmonary     | 29 | 11.9            |
| RARC                                          | normal     | cardiopulmonary     | 6  | 2.5             |
| ORC                                           | overweight | gastroenterological | 5  | 8.1             |
| ORC                                           | normal     | gastroenterological | 12 | 19.4            |

|      |            |                     |    |      |
|------|------------|---------------------|----|------|
| RARC | overweight | gastroenterological | 43 | 17.7 |
| RARC | normal     | gastroenterological | 26 | 10.7 |
| ORC  | overweight | anastomotic         | 4  | 6.5  |
| ORC  | normal     | anastomotic         | 1  | 1.6  |
| RARC | overweight | anastomotic         | 1  | 0.4  |
| RARC | normal     | anastomotic         | 1  | 0.4  |
| ORC  | overweight | other               | 3  | 4.8  |
| ORC  | normal     | other               | 3  | 4.8  |
| RARC | overweight | other               | 9  | 3.7  |
| RARC | normal     | other               | 3  | 1.2  |
